# Supplementary material for: Liquid phase deposition of iron phosphate thin films
Source: Royal Society of Chemistry journal article supplement (doi:10.1039/c8ce00632f), 2018-01-01
Supplement: c8ce00632f1.pdf [file c8ce00632f1.pdf]

# Liquid Phase Deposition of Iron Phosphate Thin Films

*Ehsan Mahboobi, Amin Yourdkhani\*, and Reza Poursalehi*

Materials Engineering Department, Faculty of Engineering, Tarbiat Modares University, Tehran,  
Iran, 14115

Corresponding Author:

\*Email: [a.yourd@modares.ac.ir](mailto:a.yourd@modares.ac.ir) ; Fax: +98 21 8288- 4390 Tel: +98 21 8288 - 3348

## SUPPORTING INFORMATION

Table 1. The effects of experimental conditions on the time intervals of the color change of the treatment solution from yellow to a colorless/pale yellow, the time it takes the treatment solution turns turbid and whether iron phosphate films were formed (✓) or not formed (X) on the glass substrates

| Temperature (°C) | Concentration (dM) | Color change time (h) | Cloudy (h) | Film Formation |
|------------------|--------------------|-----------------------|------------|----------------|
| 45               | 0.2                | 65                    | ×          | ×              |
|                  | 0.4                | 30                    | ×          | ×              |
|                  | 0.8                | 72                    | ×          | ✓              |
|                  | 1.6                | 96                    | ×          | ×              |
|                  | 3.2                | 96                    | ×          | ×              |
| 60               | 0.2                | 34                    | 40         | ✓              |
|                  | 0.4                | 12                    | 24         | ✓              |
|                  | 0.8                | 14                    | 30         | ✓ peeled off   |
|                  | 1.6                | 18                    | 39         | ✓ peeled off   |
|                  | 3.2                | 24                    | 65         | ×              |
| 75               | 0.2                | 12                    | 19         | ✓              |
|                  | 0.4                | 5                     | 7          | ✓              |
|                  | 0.8                | 10                    | 15         | ✓ peeled off   |
|                  | 1.6                | 17                    | 21         | ✓ peeled off   |
|                  | 3.2                | 45                    | 52         | ✓ peeled off   |

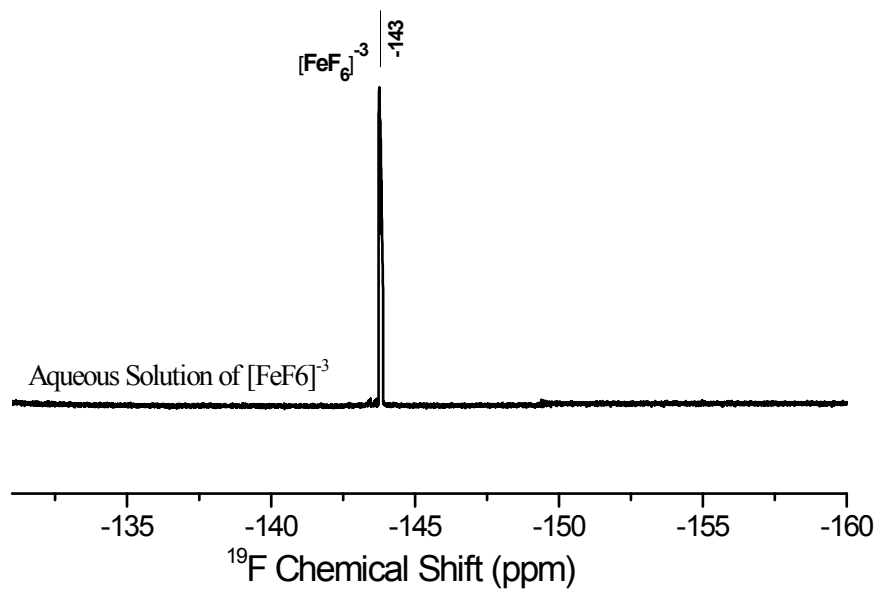

Fig. 1.  $^{19}\text{F}$ -NMR spectrum of  $[\text{FeF}_6]^{-3}$  complex

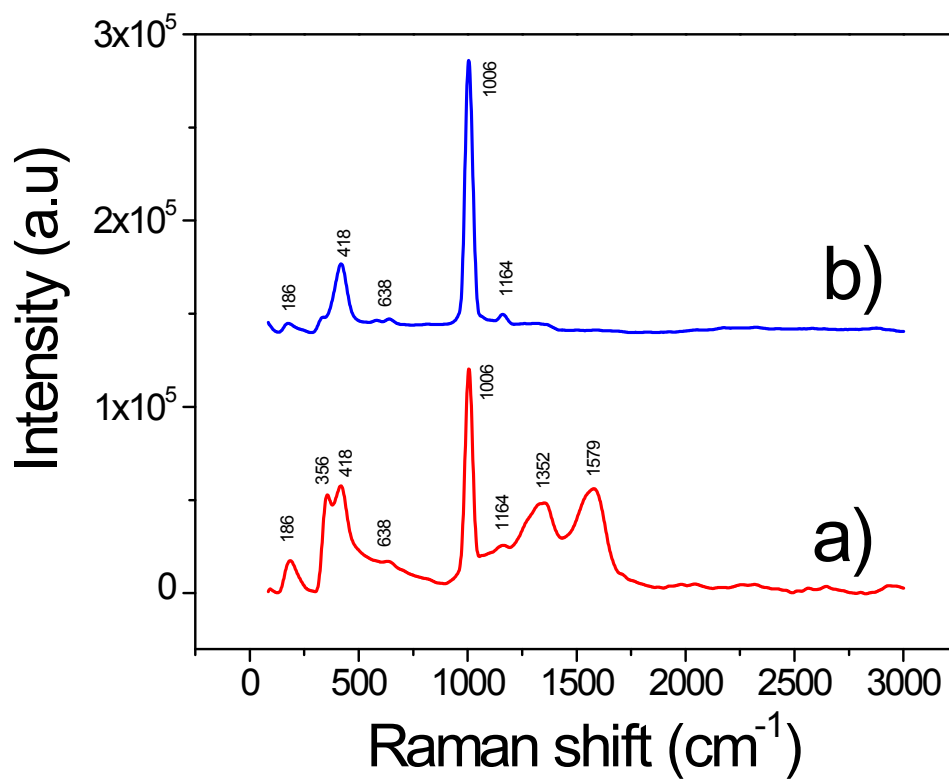

Fig. 2. Raman spectra of the powders obtained from the a) 0.4 and b) 1.6 dM treatment solutions

Raman spectra of the samples were recorded using Nicolet Almega dispersive Raman spectrometer ( $\lambda_{\text{ex}}=532$  nm). Raman spectra of the powders obtained from the 0.4 and 1.6 dM treatment solution are shown in Figure 2.a and b, respectively. The Raman peaks at 356, 1352 and 1579  $\text{cm}^{-1}$  correspond to the lattice vibration modes of hematite- $\text{Fe}_2\text{O}_3$ . The Raman peaks at 186, 418, 638, 1006 and 1164  $\text{cm}^{-1}$  are the lattice vibration modes of  $\alpha$ - quartz  $\text{FePO}_4$ .

Table 2. Rietveld fit parameters, refined lattice parameters, atomic positions and bond distances of the  $\alpha$ - quartz  $\text{FePO}_4$  with  $\text{P3}_121$  space group

| $a=b$ (Å)      | $c$ (Å)           | Volume (Å <sup>3</sup> ) | $\chi^2$ |        |                                                               | $R_{\text{wp}}$ (%) | $R_{\text{p}}$ (%) |
|----------------|-------------------|--------------------------|----------|--------|---------------------------------------------------------------|---------------------|--------------------|
| 5.0232(5)      | 11.204(1)         | 245.83(5)                | 1.589    |        |                                                               | 15.46               | 11.75              |
| Atoms          | Wyckoff Positions | Coordinates              |          |        | Bond Distance (Å)                                             | Uiso                |                    |
|                |                   | x                        | y        | z      |                                                               |                     |                    |
| Fe             | 3a                | 0.4533                   | 0        | 0.3333 | Fe-O <sub>1</sub> :1.7897(1)<br>Fe-O <sub>2</sub> : 2.0457(2) | 0.055(2)            |                    |
| P              | 3b                | 0.4387                   | 0        | 0.8333 | P-O <sub>1</sub> :1.5736(1)<br>P-O <sub>2</sub> : 1.2190(1)   | 0.015(1)            |                    |
| O <sub>1</sub> | 6c                | 0.4235                   | 0.3080   | 0.3997 | -                                                             | 0.026(1)            |                    |
| O <sub>2</sub> | 6c                | 0.4026                   | 0.2030   | 0.8759 | -                                                             | 0.077(2)            |                    |
